# Supplementary material for: Effects of mucus trail following on the distance between individuals of opposite sex and its influence on the evolution of the trait in the Ezo abalone Haliotis discus hannai
Source: PeerJ. 2020 Mar 10;8:e8710. doi: 10.7717/peerj.8710 (PMC7069403; doi:10.7717/peerj.8710)
Supplement: Supplemental Data S1 [file peerj-08-8710-s004.xlsx]

## Sheet: experimental_raw_data
marker			follower			choose the arm with mucus = 1, choose the arm without mucus =0	season	date	water tempature ℃
sex	shell length(mm)	weight(g)	sex	shell length(mm)	weight(g)
female	97.21	123.2	female	89.2	83.7	1	non reprocutive season	2015-12-11	11.72
female	93.59	105.6	male	68.85	36.6	1	non reprocutive season	2015-12-11	11.72
male	98.69	130.4	female	97.33	118.5	1	non reprocutive season	2015-12-11	11.72
male	98.12	105.8	female	88.2	91.7	1	non reprocutive season	2015-12-11	11.72
male	89.05	85	female	113.45	205.1	0	non reprocutive season	2015-12-12	11.59
female	117.13	199.4	female	116.25	186.4	1	non reprocutive season	2015-12-12	11.59
male	94.21	101.9	female	94.5	115	1	non reprocutive season	2015-12-17	11.59
female	101.94	115.8	male	102.51	166.3	1	non reprocutive season	2015-12-17	11.59
male	85.5	74.6	female	93.21	131.7	0	non reprocutive season	2015-12-17	11.59
male	84.31	75.6	male	94.54	98.3	1	non reprocutive season	2015-12-17	11.59
female	72.15	46.5	female	122	229.1	1	non reprocutive season	2015-12-18	11.9
female	87.63	96.4	female	82.3	69.1	0	non reprocutive season	2015-12-18	11.9
female	94.6	87.7	male	108	155	1	non reprocutive season	2015-12-18	11.9
male	85.38	67.8	female	100.58	129.3	1	non reprocutive season	2015-12-18	11.9
male	69.17	42	female	113.25	160.5	1	non reprocutive season	2015-12-19	11.74
male	78.78	57.32	female	92.35	103.4	1	non reprocutive season	2015-12-19	11.74
male	82.44	64.44	female	93.5	109.1	1	non reprocutive season	2015-12-19	11.74
female	77.36	75.7	male	100.6	107.6	1	non reprocutive season	2015-12-19	11.74
female	77.65	65.6	female	76.8	60.6	1	non reprocutive season	2015-12-19	11.74
female	81.85	58.6	male	90.99	88.3	1	non reprocutive season	2015-12-19	11.74
female	85.71	84	male	104.58	132	0	non reprocutive season	2015-12-21	11.64
female	66.79	30.5	male	114	165	0	non reprocutive season	2015-12-21	11.64
female	82.53	63.8	female	80.9	67.7	1	non reprocutive season	2015-12-21	11.64
male	84.55	62.5	female	93.64	109.3	1	non reprocutive season	2015-12-21	11.64
male	90.41	80.9	male	97.11	98.52	1	non reprocutive season	2015-12-21	11.64
male	75.69	55.6	male	89.82	79.99	1	non reprocutive season	2015-12-21	11.64
male	79.75	54.6	male	95.15	115.7	1	non reprocutive season	2015-12-22	11.29
male	86.57	76.68	male	69.25	39.12	0	non reprocutive season	2015-12-22	11.29
male	92.38	95.2	male	89.93	85.7	1	non reprocutive season	2015-12-22	11.29
male	106.89	144.5	male	87.03	74.65	1	non reprocutive season	2015-12-22	11.29
female	97.56	113.3	male	79.75	54.6	1	non reprocutive season	2015-12-23	11.4
female	91.73	100.5	female	89.57	96	1	non reprocutive season	2015-12-24	11.41
male	86.7	77.6	male	79.17	54.9	0	non reprocutive season	2015-12-24	11.41
male	73.2	54.66	male	91.33	87.85	1	non reprocutive season	2015-12-24	11.41
male	106	155.28	male	86.57	76.68	1	non reprocutive season	2015-12-24	11.41
male	122.3	240	male	67.41	35.47	1	non reprocutive season	2015-12-25	11.38
female	98.4	110.48	male	98.5	132.7	1	non reprocutive season	2015-12-28	10.01
female	95.05	99.627	female	98.59	121.4	0	non reprocutive season	2015-12-28	10.01
female	95.6	115.3	male	88.64	83.9	0	non reprocutive season	2015-12-28	10.01
female	55.1	17.3	male	71.05	42.9	1	reprocutive season	2016-08-16	21.56
male	54.2	21.7	male	63.5	30.68	1	reprocutive season	2016-08-16	21.56
female	69.5	39.7	female	60.24	24.3	1	reprocutive season	2016-08-16	21.56
female	68.25	39.7	female	60.23	24.3	1	reprocutive season	2016-08-16	21.56
male	60.1	30.31	female	55.15	17.3	0	reprocutive season	2016-08-16	21.56
female	58.3	23.5	male	60.1	30.31	0	reprocutive season	2016-08-17	20.63
male	47.55	11.28	female	58.3	23.5	1	reprocutive season	2016-08-17	20.63
female	57.55	20.25	female	58.2	20.58	1	reprocutive season	2016-08-17	20.63
female	65	35	female	66	35	1	reprocutive season	2016-08-17	20.63
male	59.65	29.2	female	65	35	1	reprocutive season	2016-08-17	20.63
female	60.85	24.5	male	59.65	29.2	1	reprocutive season	2016-08-17	20.63
male	51.55	14.7	female	60.85	24.5	0	reprocutive season	2016-08-17	20.63
male	56.74	19.94	male	52.55	16.15	1	reprocutive season	2016-08-18	21.54
male	56.4	21.22	female	57.25	20.25	1	reprocutive season	2016-08-18	21.54
female	62	29.5	male	56.94	19.74	1	reprocutive season	2016-08-18	21.54
female	82.44	63.47	male	87.77	76.62	1	reprocutive season	2016-08-18	21.54
male	80.83	56.55	female	90.07	86.41	1	reprocutive season	2016-08-18	21.54
male	86	74.05	female	88.13	91.63	0	reprocutive season	2016-08-18	21.54
male	75	41.8	female	101.26	103.28	1	reprocutive season	2017-06-26	16.96
female	110.7	139.3	female	93.5	83.2	0	reprocutive season	2017-06-26	16.96
male	68.91	35.86	male	90.69	93.27	1	reprocutive season	2017-06-26	16.96
male	74.93	49.86	male	89.7	91.25	0	reprocutive season	2017-06-27	16.68
male	96.79	98.81	male	93.9	86.2	1	reprocutive season	2017-06-27	16.68
male	80.49	69.85	female	87.13	49.12	1	reprocutive season	2017-07-06	18.52
female	71.64	43.99	female	77.7	56.7	1	reprocutive season	2017-07-06	18.52
male	86.38	89.52	female	77.98	39.48	1	reprocutive season	2017-07-08	19.51
female	89.4	83.73	male	70.47	62.78	1	reprocutive season	2017-07-08	19.51
male	77.26	50.85	female	85.38	53.22	1	reprocutive season	2017-07-09	19.89
female	71.57	43.05	male	76.82	41.98	1	reprocutive season	2017-07-09	19.89
female	81.34	63	male	69.17	42	1	reprocutive season	2017-07-10	20.25
female	102.09	129.4	female	70.67	55.42	1	reprocutive season	2017-07-10	20.25
female	103.38	138.2	female	78.85	141.59	0	reprocutive season	2017-07-10	20.25
female	90.15	83.17	female	106.56	63.47	1	reprocutive season	2017-07-15	19.16
female	87.77	77.63	male	80.1	75.88	1	reprocutive season	2017-07-15	19.16
female	90.69	83.55	male	89.3	84.7	1	reprocutive season	2017-07-17	19.06
male	93.9	91.25	male	91	99.14	1	reprocutive season	2017-07-17	19.06
